# Supplementary material for: Tinnitus, Suicide, and Suicidal Ideation: A Scoping Review of Primary Research
Source: MDPI journal article supplement (doi:10.3390/brainsci13101496), 2023-10-23
Supplement: s1 [file s1]

**Table S1.** Epidemiological studies

| AUTHOR      | DATE | TITLE                                                                                                                        | COUNTRY | POPULATION                                                                | SAMPLE SIZE | PARTICIPANTS WITH TINNITUS (N) | TINNITUS SEVERITY                                                      | METHOD/QUESTION USED TO IDENTIFY TINNITUS                                                                                                                          | METHOD/QUESTION USED TO IDENTIFY BOTHERSOME TINNITUS                                                                                  | METHOD/QUESTION USED TO IDENTIFY SUICIDE/SUICIDAL IDEATION                               | METHOD OF SUICIDE                                  |
|-------------|------|------------------------------------------------------------------------------------------------------------------------------|---------|---------------------------------------------------------------------------|-------------|--------------------------------|------------------------------------------------------------------------|--------------------------------------------------------------------------------------------------------------------------------------------------------------------|---------------------------------------------------------------------------------------------------------------------------------------|------------------------------------------------------------------------------------------|----------------------------------------------------|
| Han et al   | 2018 | Tinnitus, depression, and suicidal ideation in adults: A nationally representative general population sample                 | Korea   | Respondents of tinnitus evaluation questionnaire of the KNHANE S aged 19+ | 28,930      | 6391                           | Mild, moderate and severe (no disturbance, annoying and very annoying) | During the past year, did you ever hear a sound (buzzing, hissing, ringing, humming, roaring, machinery noise) originating in your ear? (yes, no, cannot remember) | How much did the sound originating in your ear disturb your daily life? (no, annoying, very annoying level causing sleep disturbance) | Within the past year, have you ever seriously considered attempting suicide? (yes or no) | No suicide - ideation reported                     |
| Martz et al | 2018 | Tinnitus, Depression, Anxiety, and Suicide in Recent Veterans: A Retrospective Analysis                                      | USA     | Veterans who separated from service and who were not killed in action.    | 769,934     | 116,358 (15%)                  | Not reported                                                           | NA-diagnosed with tinnitus                                                                                                                                         | Not reported                                                                                                                          | Not reported                                                                             | ICD-10 codes were used to identify cause of death. |
| Kim et al   | 2018 | Association between tinnitus and mental health among Korean adolescents: The Korea National Health and Nutrition Examination | Korea   | Adolescent respondents of the KNHANE S V                                  | 1587        | 286                            | no problem, bothering, having trouble sleeping                         | In the past 12 months, have you been bothered by buzzing in your ears? (yes, no)                                                                                   | How much of a problem is the ringing in your ears? (no problem, bothering, having trouble sleeping).                                  | Have you ever thought of committing suicide in the last year? (yes, no)                  | No suicide - ideation reported                     |

|            |       |                                                                                                                                               |       |                                                                                                                        |      |               |                                                                                |                                                                                                                                           |                                                                                                                                                                                |                                                                                                |    |
|------------|-------|-----------------------------------------------------------------------------------------------------------------------------------------------|-------|------------------------------------------------------------------------------------------------------------------------|------|---------------|--------------------------------------------------------------------------------|-------------------------------------------------------------------------------------------------------------------------------------------|--------------------------------------------------------------------------------------------------------------------------------------------------------------------------------|------------------------------------------------------------------------------------------------|----|
|            |       | ion Survey                                                                                                                                    |       |                                                                                                                        |      |               |                                                                                |                                                                                                                                           |                                                                                                                                                                                |                                                                                                |    |
| Seo et al  | 2015  | Relationship between tinnitus and suicidal behaviour in Korean men and women: a cross-sectional study                                         | Korea | Korean individuals who participated in 2010 to 2012 Korean National Health and Nutrition Examination Survey (KNHANES). | 1746 | 3949<br>21.4% | not annoying/annoying; irritating; severely annoying and causes sleep problems | 'Within the past year, did you ever hear a sound (buzzing, hissing, ringing, humming, roaring, machinery noise) originating in your ear?' | 'How severe is this noise in your daily life?'                                                                                                                                 | In the last 12 months, did you think about committing suicide?                                 | NA |
| Park et al | 2020  | Psychiatric Distress as a Common Risk Factor for Tinnitus and Joint Pain: A National Population-Based Survey                                  | Korea | General over 50s                                                                                                       | 9032 | 2413          | classified as none, not annoying, and severely annoying                        | single question                                                                                                                           | single question: none, not annoying, severely annoying.                                                                                                                        | positive answer to the question about suicidal ideation and suicide attempt over the past year | NA |
| Park et al | 2020a | Tinnitus and Its Association With Mental Health and Health-Related Quality of Life in an Older Population: A Nationwide Cross-Sectional Study | Korea | General over 60s                                                                                                       | 5129 | 1402          | Rated 'annoying' by 605 participants                                           | "For the past executive 12 months, have you ever had ringing, roaring, or buzzing in your ears?"                                          | Survey questions: normal, tolerable tinnitus, and annoying tinnitus identified by asking participants with tinnitus "How much do these sounds create annoyance in your life?." | "Have you ever thought about committing suicide within 12 months?"                             | NA |

|          |      |                                                                                                    |       |                                     |      |     |                                      |                                                                                        |                                                           |                                                                             |    |
|----------|------|----------------------------------------------------------------------------------------------------|-------|-------------------------------------|------|-----|--------------------------------------|----------------------------------------------------------------------------------------|-----------------------------------------------------------|-----------------------------------------------------------------------------|----|
| Yu et al | 2019 | Association between menstrual cycle irregularity and tinnitus: a nationwide population-based study | Korea | General, premenopausal Korean women | 4633 | 934 | Rated 'annoying' by 605 participants | "For the past 12 months, have you ever had ringing, roaring, or buzzing in your ears?" | "How much do these sounds create annoyance in your life?" | "Have you ever thought about committing suicide within the last 12 months?" | NA |
|----------|------|----------------------------------------------------------------------------------------------------|-------|-------------------------------------|------|-----|--------------------------------------|----------------------------------------------------------------------------------------|-----------------------------------------------------------|-----------------------------------------------------------------------------|----|

Table S2. Observational studies

| AUTHOR       | DATE | TITLE                                                                          | COUNTRY | POPULATION                                                                             | SAMPLE SIZE | PARTICIPANTS WITH TINNITUS (N)                   | TINNITUS SEVERITY                                   | METHOD/QUESTION USED TO IDENTIFY TINNITUS                                       | METHOD/QUESTION USED TO IDENTIFY BOTHERSOME TINNITUS | METHOD/QUESTION USED TO IDENTIFY SUICIDE/SUICIDAL IDEATION | METHOD OF SUICIDE                    |
|--------------|------|--------------------------------------------------------------------------------|---------|----------------------------------------------------------------------------------------|-------------|--------------------------------------------------|-----------------------------------------------------|---------------------------------------------------------------------------------|------------------------------------------------------|------------------------------------------------------------|--------------------------------------|
| Aazh & Moore | 2018 | Thoughts about Suicide and Self-Harm in Patients with Tinnitus and Hyperacusis | UK      | Clinical tinnitus patients - specialist clinic for patients seeking help with tinnitus | 150         | 144                                              | 32 pps - mild, 42 pps - moderate, 54 pps - severe   | Tinnitus Handicap Inventory, The Visual Analog Scale (VAS)                      | Tinnitus Handicap Inventory, VAS                     | Question 9 on PHQ9                                         | No suicide - study measured ideation |
| Lugo et al   | 2019 | Sex-Specific Association of Tinnitus With Suicide Attempts                     | Sweden  | Adults from Stockholm County (Sweden)                                                  | 71,542      | 16 066 (any tinnitus), of which 1995 were severe | "No; Yes (moderate problem); Yes (severe problem)". | "Do you have any of the following health problems or symptoms?" ...tinnitus.... | Not reported                                         | "Have you ever tried to take your own life?"               | NA                                   |
| Aazh et al   | 2019 | Parental Mental Illness in Childhood as a Risk                                 | UK      | Patients at Tinnitus and Hyperacusis                                                   | 292         | 286                                              | Mild, moderate, severe                              | Tinnitus Handicap Inventory                                                     | Tinnitus Handicap Inventory.                         | Question 9 on PHQ9.                                        | No suicide - ideation                |

|              |      |                                                                                                    |        |                                                                                                                                                                             |         |                                                            |                                                     |                                                                                                                        |      |                                                                                                                                                   |          |
|--------------|------|----------------------------------------------------------------------------------------------------|--------|-----------------------------------------------------------------------------------------------------------------------------------------------------------------------------|---------|------------------------------------------------------------|-----------------------------------------------------|------------------------------------------------------------------------------------------------------------------------|------|---------------------------------------------------------------------------------------------------------------------------------------------------|----------|
|              |      | Factor for Suicidal and Self-Harm Ideations in Adults Seeking Help for Tinnitus and/or Hyperacusis |        | Therapy Specialist Clinic                                                                                                                                                   |         |                                                            |                                                     |                                                                                                                        |      |                                                                                                                                                   | reported |
| Chen g et al | 2023 | Tinnitus and risk of attempted suicide: A one year follow-up study                                 | Taiwan | Patients aged ≥20 years old who received a first-time diagnosis of tinnitus and no history of suicide for 3 years before tinnitus onset. Matched controls with no tinnitus. | 386,055 | subjective Any - includes codes for tinnitus, unspecified. | Not reported                                        | At least two outpatient medical claims with a diagnosis of tinnitus filed by an otorhinolaryngologist or a neurologist | none | none-not recorded in ICD codes. whether or not a sampled patient had received a diagnosis of suicide attempt during one-year follow-up. ICD codes | NA       |
| Chen et al   | 2023 | The Comorbidity of Depression and Anxiety Symptoms in Tinnitus Sufferers: A Network Analysis       | China  | Tinnitus sufferers aged over 11 years followed up at the tinnitus outpatient department in Chinese PLA General Hospital                                                     | 566     | 566                                                        | 0-10 VAS; Minimal = 0–3, mild = 4–6), Severe = 7–10 | Not reported                                                                                                           | VAS  | Question 9 on PHQ9                                                                                                                                | NA       |

NA = not applicable, PHQ9 = Patient Health Questionnaire 9, VAS = Visual Analogue Scale.

**Table S3.** Case studies

| AUTHOR               | DATE | TITLE                                                                                        | COUNTRY     | POPULATION                     | SAMPLE SIZE | PARTICIPANTS WITH TINNITUS (N) | TINNITUS SEVERITY                                                  | METHOD/QUESTION USED TO IDENTIFY TINNITUS                                                                                  | METHOD/QUESTION USED TO IDENTIFY BOTHERSOME TINNITUS   | METHOD/QUESTION USED TO IDENTIFY SUICIDE/SUICIDAL IDEATION | METHOD OF SUICIDE                              |
|----------------------|------|----------------------------------------------------------------------------------------------|-------------|--------------------------------|-------------|--------------------------------|--------------------------------------------------------------------|----------------------------------------------------------------------------------------------------------------------------|--------------------------------------------------------|------------------------------------------------------------|------------------------------------------------|
| Chang & Wu           | 2012 | Serotonin-Norepinephrine Reuptake Inhibitor Treatment for Tinnitus and Depression            | Taiwan      | Male with bilateral tinnitus   | 1           | 1                              | Severe - interfering with mood, sleep and psychosocial functioning | Not reported                                                                                                               | Not reported                                           | Not reported                                               | No suicide - ideation reported                 |
| Da Silva Souza et al | 2016 | Effects of Transcranial Direct Current Stimulation in Chronic Tinnitus Treatment: Case Study | Brazil      | Female with bilateral tinnitus | 1           | 1                              | Not reported                                                       | acuphenometry, VAS                                                                                                         | acuphenometry, VAS                                     | Not reported                                               | No suicide - patient reported ideation         |
| Dijkstra et al       | 2018 | Effective deep brain stimulation of intractable tinnitus: A case study                       | Netherlands | Female tinnitus patient        | 1           | 1                              | Intractable tinnitus causing severe suffering                      | Tinnitus Handicap Inventory, Tinnitus Functional Index                                                                     | Tinnitus Handicap Inventory, Tinnitus Functional Index | Hamilton Depression Rating Scale                           | Previous suicide attempt with autointoxication |
| Ensink et al         | 2003 | Treatment for Severe Palatocloacus by Occlusion of the                                       | Netherlands | Male child with tinnitus       | 1           | 1                              | Intense, loud, severely interfering with sleep                     | Tinnitus heard by examiner by bringing down ear at a distance of approximately 20 to 30 cm to the left ear of the patient. | Not reported                                           | Expressed suicide wish from patient                        | No suicide - ideation reported                 |

|                                     |      |                                                   |     |                                                                               |     |   |                                         |                                                                                                                                                                                   |                                                                                                                                                            |                                                                                             |                                                                                                                                                                  |
|-------------------------------------|------|---------------------------------------------------|-----|-------------------------------------------------------------------------------|-----|---|-----------------------------------------|-----------------------------------------------------------------------------------------------------------------------------------------------------------------------------------|------------------------------------------------------------------------------------------------------------------------------------------------------------|---------------------------------------------------------------------------------------------|------------------------------------------------------------------------------------------------------------------------------------------------------------------|
|                                     |      | Eustachian Tube                                   |     |                                                                               |     |   |                                         |                                                                                                                                                                                   |                                                                                                                                                            |                                                                                             |                                                                                                                                                                  |
| Franke<br>nburg<br>&<br>Hegart<br>y | 1994 | Tinnitus,<br>Psychosis,<br>and<br>Suicide         | USA | Tinnitus<br>patients                                                          | 4   | 4 | Reported as<br>unrelenting,<br>tiresome | Not reported                                                                                                                                                                      | Not reported                                                                                                                                               | Expressed<br>suicide<br>wishes<br>from<br>patients.<br>One<br>patient attempted<br>suicide. | Not reported                                                                                                                                                     |
| Joshi &<br>Sharma                   | 2012 | A Case<br>of<br>Asenapine-<br>Induced<br>Tinnitus | USA | Female<br>patient                                                             | 1   | 1 | Distressing                             | Not reported                                                                                                                                                                      | Not reported                                                                                                                                               | Not reported                                                                                | No suicide -<br>ideation<br>reported.<br>Suicidal<br>ideation.                                                                                                   |
| Lewis<br>&<br>Stephens              | 1995 | Parasuicide and<br>tinnitus                       | UK  | Patients<br>admitted for<br>overdose to<br>Poisons<br>Unit<br>Aug-Oct<br>1993 | 184 | 3 | Not reported                            | Do you suffer from<br>tinnitus, that is, noise(s)<br>in your ears or head?<br>(yes,no). Please<br>describe the tinnitus<br>(pulsatile, buzzing,<br>whistling, hissing,<br>other). | What<br>influence<br>did the<br>tinnitus<br>have on<br>your<br>decision to<br>take an<br>overdose?<br>(none, it<br>contributed,<br>the<br>main<br>reason). | Patients<br>were<br>admitted<br>for<br>previous<br>overdose.                                | Self-harm<br>/Attempted<br>suicide<br>by<br>overdose.                                                                                                            |
| Lewis,<br>Stephens and<br>Huws      | 1992 | Suicide<br>in<br>tinnitus<br>sufferers            | UK  | Clinical<br>tinnitus<br>patients,<br>and<br>one<br>additional<br>account      | 6   | 6 | Severe                                  | Various                                                                                                                                                                           | Not reported                                                                                                                                               | Reported<br>suicides in<br>clinic<br>patients                                               | Hanging,<br>attempted<br>overdose,<br>of<br>alcohol<br>and<br>drugs,<br>overdose<br>of<br>antidepressants,<br>overdose<br>of pain<br>medication,<br>suffocation. |

|                             |      |                                                                                        |     |                                                                                    |     |     |                                                                |                                                                                                                                            |                                                                                                                                          |                                                                                                                  |                                                          |
|-----------------------------|------|----------------------------------------------------------------------------------------|-----|------------------------------------------------------------------------------------|-----|-----|----------------------------------------------------------------|--------------------------------------------------------------------------------------------------------------------------------------------|------------------------------------------------------------------------------------------------------------------------------------------|------------------------------------------------------------------------------------------------------------------|----------------------------------------------------------|
| Lewis, Stephens and McKenna | 1994 | Tinnitus and suicide                                                                   | UK  | Clinical tinnitus patients                                                         | 28  | 28  | Not reported                                                   | Tinnitus duration: Years and months<br>Tinnitus ear: right/left/both/head<br>Nature of tinnitus: pulsatile/whistling/buzzing/hissing/other | Not reported                                                                                                                             | Clinics required to report on patients who die by suicide.                                                       | Self-poisoning, firearm, suffocation, hanging, drowning. |
| Pridmore et al              | 2012 | Tinnitus and Suicide: Recent Cases on the Public Record Give Cause for Reconsideration | USA | 4 cases assessed by a coroner over 10 years-found in newspaper articles and online | 4   | 4   | NR                                                             | Not reported                                                                                                                               | Not reported                                                                                                                             | Newspaper and Web search for articles published over the last 10 years                                           | Jumped from height. Hanging. Firearms. Self-stabbing.    |
| Fox-Thomases                | 2016 | Suicidal Ideation Among Patients with Chronic Tinnitus                                 | USA | Clinical records which included the Tinnitus Reaction Questionnaire (TRQ)          | 200 | 200 | Not significant, significant, mild, moderate, severe, profound | TRQ in clinical record                                                                                                                     | Using a 5-point Likert scale (0-4), patients rated tinnitus distress for 26 items ranging from "not at all" to "almost all of the time." | "My tinnitus has led me to think about suicide" (#24 on TRQ). how tinnitus has affected you over the past week." | NA                                                       |
| Sisler et al                | 2015 | Self-Decapitation Attempt Attributed to Tinnitus and Oral Corticosteroids              | USA | clinical patient                                                                   | 1   | 1   | severe tinnitus                                                | case report                                                                                                                                | case report                                                                                                                              | case report                                                                                                      | NA-attempted by self-poisoning and self-laceration       |

ICD= International Classification of Disease.
